# Supplementary material for: Colonization by Staphylococcus aureus Predicts Postoperative Complications After Tracheoplasty for Airway Stenosis
Source: Research Square preprint supplement (doi:10.21203/rs.3.rs-8354585/v1), 2026-01-09
Supplement: Supplementary file 1 [file a89cfd5cc783790586a3b184.docx]

**Supplementary material**

| **Table S1. Histopathological characteristics of resected specimens in patients subjected to surgery for tracheal stenosis** | | | | |
| --- | --- | --- | --- | --- |
| **Characteristics** | **Overall**, N = 87*1* | **Any complication** | | |
| **No**, N = 54*1* | **Yes**, N = 33*1* | **p-value***2* |
| Chronic tracheitis | 74 (93%) | 45 (92%) | 29 (94%) | >0.9 |
| Fibrosis | 71 (89%) | 42 (86%) | 29 (94%) | 0.5 |
| Mucosal ulceration | 22 (28%) | 11 (22%) | 11 (35%) | 0.2 |
| Scamous metaplasia | 48 (60%) | 30 (61%) | 18 (58%) | 0.8 |
| Osseous metaplasia | 26 (33%) | 15 (31%) | 11 (35%) | 0.7 |
| *1* Median (IQR); n (%).  *2* Wilcoxon rank sum test; Pearson’s Chi-squared test; Fisher’s exact test. | | | | |

| **Table S2. Preoperative laboratory parameters in patients subjected to tracheoplasty** | | | | |
| --- | --- | --- | --- | --- |
| **Characteristics** | **Overall**, N = 87*1* | **Any complication** | | |
| **No**, N = 54*1* | **Yes**, N = 33*1* | **p-value***2* |
| WBC, 109/L | 7.0 (5.7, 8.3) | 6.9 (5.7, 8.3) | 7.0 (5.7, 8.2) | >0.9 |
| >12 x 109/L | 9 (10%) | 7 (13%) | 2 (6.1%) | 0.5 |
| Neutrophils, 109/L | 3.9 (3.0, 5.1) | 3.9 (2.8, 5.4) | 3.7 (3.2, 4.8) | 0.8 |
| Lymphocytes, 109/L | 2.0 (1.5, 2.4) | 2.0 (1.4, 2.3) | 2.0 (1.6, 2.5) | 0.3 |
| < 1.2 x 109/L | 21 (24%) | 16 (30%) | 5 (15%) | 0.13 |
| NLR | 1.8 (1.3, 2.7) | 1.9 (1.3, 2.7) | 1.8 (1.5, 2.7) | 0.6 |
| Eosinophils, 109/L | 0.1 (0.1, 0.2) | 0.1 (0.1, 0.2) | 0.1 (0.1, 0.2) | 0.2 |
| > 0.3 x 109/L | 8 (9.2%) | 6 (11%) | 2 (6.1%) | 0.7 |
| Hb, g/dL | 14.9 (13.3, 15.9) | 15.0 (13.5, 16.1) | 14.7 (12.9, 15.7) | 0.3 |
| Htc, % | 44.1 (39.9, 47.4) | 44.0 (40.0, 47.0) | 44.5 (39.9, 47.5) | 0.7 |
| Platelets, 103/μL | 270.0 (220.5, 308.5) | 260.5 (221.3, 301.5) | 274.0 (219.0, 310.0) | 0.5 |
| <150 x 103/μL | 3 (3.4%) | 2 (3.7%) | 1 (3.0%) | >0.9 |
| Glucose, mg/dL | 93.0 (85.0, 106.5) | 95.0 (84.5, 108.8) | 93.0 (85.0, 106.0) | 0.9 |
| Urea, mg/dL | 30.0 (22.0, 37.0) | 28.5 (22.0, 34.0) | 33.0 (23.0, 41.0) | 0.3 |
| BUN, mg/dL | 14.0 (10.0, 17.5) | 13.0 (10.0, 16.0) | 15.0 (11.0, 19.0) | 0.2 |
| Cr, mg/dL | 0.8 (0.7, 0.9) | 0.8 (0.7, 0.9) | 0.8 (0.7, 0.9) | 0.7 |
| HbA1c, % | 5.7 (5.3, 6.7) | 5.8 (5.2, 6.7) | 5.7 (5.4, 6.4) | 0.5 |
| Na, mEq/L | 138.0 (137.0, 140.0) | 138.0 (137.0, 140.0) | 138.0 (137.0, 140.0) | 0.8 |
| K, mEq/L | 4.1 (3.9, 4.3) | 4.1 (3.9, 4.3) | 4.2 (4.0, 4.2) | 0.5 |
| Cl, mEq/L | 105.0 (103.0, 106.0) | 105.0 (103.0, 106.0) | 105.0 (104.0, 107.0) | 0.3 |
| Ca, mEq/L | 9.2 (8.8, 9.5) | 9.2 (8.9, 9.5) | 9.2 (8.7, 9.5) | 0.5 |
| Mg, mEq/L | 2.0 (1.8, 2.1) | 1.9 (1.8, 2.0) | 2.0 (1.9, 2.1) | 0.2 |
| P, mEq/L | 4.1 (3.1, 4.5) | 4.1 (3.1, 4.6) | 4.1 (3.1, 4.3) | 0.6 |
| Proteins, g/dL | 7.2 (6.8, 7.6) | 7.2 (6.8, 7.6) | 7.1 (6.8, 7.6) | 0.9 |
| Albumin, g/dL | 4.3 (4.0, 4.5) | 4.3 (4.0, 4.5) | 4.2 (3.9, 4.5) | 0.7 |
| Bilirrubin, mg/dL | 0.5 (0.4, 0.6) | 0.5 (0.4, 0.7) | 0.5 (0.3, 0.6) | 0.2 |
| AST, U/L | 18.0 (15.0, 23.3) | 18.0 (15.0, 24.0) | 18.0 (15.0, 22.0) | 0.6 |
| ALT, U/L | 21.0 (12.8, 29.3) | 21.0 (13.0, 29.5) | 23.0 (11.0, 28.0) | 0.8 |
| GGT, IU/L | 26.0 (18.0, 45.5) | 24.5 (18.0, 41.3) | 35.0 (22.0, 52.0) | 0.14 |
| LDH, U/L | 164.5 (135.8, 186.0) | 164.0 (130.5, 182.0) | 165.0 (143.0, 194.0) | 0.3 |
| ALP, IU/L | 79.0 (68.0, 97.3) | 78.0 (62.5, 96.0) | 87.0 (70.0, 98.0) | 0.2 |
| CPK, μg/L | 66.0 (41.0, 104.3) | 58.0 (46.5, 86.5) | 69.0 (34.0, 108.0) | 0.7 |
| PT, seconds | 11.7 (11.1, 12.5) | 11.7 (10.9, 12.3) | 12.0 (11.1, 12.6) | 0.11 |
| INR | 1.1 (1.0, 1.2) | 1.1 (1.0, 1.1) | 1.1 (1.0, 1.2) | 0.2 |
| aPTT, seconds | 32.8 (31.1, 35.9) | 32.3 (30.7, 35.9) | 32.8 (31.2, 35.7) | 0.6 |
| CRP, mg/dL | 0.4 (0.1, 1.1) | 0.3 (0.1, 0.7) | 0.6 (0.2, 2.3) | 0.3 |
| PCT, ng/mL | 0.0 (0.0, 0.0) | 0.0 (0.0, 0.0) | 0.0 (0.0, 0.0) | 0.7 |
| BNP, pg/mL | 10.0 (10.0, 17.1) | 10.0 (10.0, 17.4) | 10.0 (10.0, 14.0) | 0.6 |
| *1* Median (IQR); n (%).  *2* Wilcoxon rank sum test; Pearson’s Chi-squared test; Fisher’s exact test.  ALP, alkaline phosphatase; ALT, alanine aminotransferase; aPTT, activated partial thromboplastin time; AST, aspartate aminotransferase; BNP, brain natriuretic peptide; BUN, blood urea nitrogen; CPK, creatin phosphokinase; Cr, creatinin; CRP, C-reactive protein; GGT, gamma glutamil transpeptidase; Hb, hemoglobin; Htc, hematocrit; INR, international normalized ratio; LDH, lactate dehydrogenase; NLR, neutrophil-to-lymphocyte ratio; PCT, procalcitonin; PT, prothrombin time; WBC, white blood cells. | | | | |

| Table S3. Logistic regression analysis of the factors associated with specific outcomes in patients subjected to tracheostomy | | | | |
| --- | --- | --- | --- | --- |
| Outcome | **OR***1* | **95% CI***1* | **p-value** | **q-value***2* |
| Re-stenosis |  |  |  |  |
| Cotton classification | 3.50 | 1.25, 10.3 | **0.017** | 0.592 |
| Blood loss | 1.00 | 1.00, 1.01 | **0.026** | 0.608 |
| Any bacterial isolate | 3.30 | 1.21, 9.36 | **0.020** | 0.592 |
| Granulation tissue |  |  |  |  |
| Cotton classification | 5.87 | 1.89, 19.4 | **0.002** | 0.082 |
| Granulation tissue before surgery | 3.47 | 1.07, 11.1 | **0.039** | 0.628 |
| Blood loss | 1.01 | 1.00, 1.01 | **0.002** | 0.082 |
| Tracheitis |  |  |  |  |
| Epilepsy | 5.24 | 1.32, 20.3 | **0.020** | 0.334 |
| GGT | 1.03 | 1.01, 1.07 | **0.006** | 0.205 |
| PT | 1.76 | 1.04, 3.15 | **0.036** | 0.477 |
| Blood loss | 1.01 | 1.00, 1.01 | **0.015** | 0.290 |
| Any bacterial isolate | 17.1 | 4.17, 116 | **<0.001** | **0.001** |
| Isolates per patient | 2.88 | 1.34, 6.62 | **0.007** | 0.205 |
| *S. aureus* | 4.62 | 1.37, 15.8 | **0.014** | 0.290 |
| *E. coli* | 12.0 | 1.07, 270 | **0.044** | 0.477 |
| Permanent tracheostomy |  |  |  |  |
| Previous tracheostomy as cause | 3.77 | 1.08, 15.2 | **0.037** | 0.478 |
| Cotton classification | 6.12 | 1.69, 24.2 | **0.006** | 0.167 |
| Any bacterial isolate | 12.9 | 3.07, 88.4 | **<0.001** | **0.014** |
| Isolates per patient | 2.65 | 1.20, 6.18 | **0.017** | 0.349 |
| *S. aureus* | 4.36 | 1.20, 16.0 | **0.026** | 0.434 |
| Drug resistance | 8.21 | 1.95, 35.1 | **0.005** | 0.167 |
| Pneumonia |  |  |  |  |
| Age | 1.04 | 1.00, 1.09 | **0.043** | 0.282 |
| Diabetes | 7.89 | 1.66, 36.7 | **0.011** | 0.118 |
| Inhaled steroids | 5.74 | 1.00, 109 | **0.049** | 0.307 |
| Days of preoperative antibiotics | 1.16 | 1.01, 1.34 | **0.031** | 0.245 |
| Preoperative mucolytics | 12.0 | 2.10, 227 | **0.003** | **0.045** |
| Platelets | 0.99 | 0.98, 1.00 | **0.022** | 0.200 |
| Glucose | 1.01 | 1.00, 1.03 | **0.037** | 0.259 |
| TP | 2.61 | 1.39, 5.63 | **0.002** | **0.045** |
| Blood loss | 1.01 | 1.00, 1.01 | **0.003** | **0.045** |
| Any bacterial isolate | 22.5 | 3.90, 428 | **<0.001** | **0.005** |
| Isolates per patient | 3.58 | 1.53, 9.37 | **0.003** | **0.045** |
| *S. aureus* | 21.7 | 4.76, 156 | **<0.001** | **0.002** |
| *E. coli* | 19.0 | 1.65, 437 | **0.020** | 0.196 |
| Dysphonia |  |  |  |  |
| Epilepsy | 8.87 | 1.80, 44.9 | **0.009** | 0.336 |
| Cotton classification | 4.50 | 1.05, 20.7 | **0.042** | 0.456 |
| Montgomery T-tube | 12.8 | 1.35, 124 | **0.028** | 0.336 |
| Blood loss | 1.01 | 1.00, 1.01 | **0.012** | 0.336 |
| Any bacterial isolate | 6.48 | 1.38, 46.4 | **0.017** | 0.336 |
| Dehiscence |  |  |  |  |
| GGT | 1.03 | 1.00, 1.06 | **0.049** | 0.804 |
| Any bacterial isolate | 13.2 | 2.11, 256 | **0.004** | 0.164 |
| *S. aureus* | 5.33 | 1.08, 29.4 | **0.041** | 0.804 |
| Drug resistance | 13.9 | 2.60, 84.1 | **0.003** | 0.159 |
| Re-intervention |  |  |  |  |
| Diabetes | 4.92 | 1.27, 21.1 | **0.022** | 0.283 |
| Cotton classification | 2.81 | 1.05, 7.90 | **0.041** | 0.403 |
| Blood loss | 1.01 | 1.00, 1.01 | **0.004** | 0.110 |
| Isolates per patient | 2.36 | 1.20, 4.92 | **0.013** | 0.246 |
| *S. aureus* | 5.08 | 1.76, 15.2 | **0.003** | 0.104 |
| Drug resistance | 3.87 | 1.05, 14.9 | **0.042** | 0.403 |
| *1* OR = Odds Ratio, CI = Confidence Interval.  *2* False discovery rate correction for multiple testing. | | | | |
